# Supplementary material
Source: publisher figshare collection journal article supplement (https://acs.figshare.com/ndownloader/files/5396159)
Supplement: Supplementary file 1 [file 5396159]

**In-depth proteomics identifies a role for autophagy in controlling ROS-mediated endothelial permeability**

Francesca Patella<sup>1</sup>, Lisa J Neilson<sup>1</sup>, Dimitris Athineos<sup>1</sup>, Zahra Erami<sup>1</sup>, Kurt Anderson<sup>1</sup>, Karen Blyth<sup>1</sup>, Kevin M Ryan<sup>1</sup> and Sara Zanivan<sup>1,\*</sup>

<sup>1</sup>Cancer Research UK Beatson Institute, Glasgow G611BD, UK

## **Supporting Information**

**Table S1. Proteins identified and quantified in HUVECs (total lysate) forming a tightly confluent monolayer.**

**Table S2. Gene Ontology (GO) category enrichment analysis of proteins regulated when HUVECs form a tightly confluent monolayer**

**Table S3. Proteins identified and quantified in HUVECs (total lysate) cultured confluent for 4 days upon 4h bafilomycin treatment.**

**Table S4. Proteins identified and quantified in HUVECs (serum-free conditioned medium) cultured confluent for 4 days upon 4h bafilomycin treatment.**

**Table S5. Proteins identified and quantified in HUVECs (total lysate) silenced for ATG5.**

**Table S6. Two dimension (2D) Gene Ontology (GO) category enrichment analysis upon autophagy inhibition with si-ATG5 or bafilomycin.**

**Figure S1. Proteomic analyses.** (A) Time resolved SILAC-based proteomic analysis used to identify cellular processes regulated in HUVEC while assembling into a physiologically permeable monolayer. (B) SILAC-based proteomic analysis used to identify proteomic alterations which occur in HUVEC upon acute/short term or chronic/long term inhibition of autophagy. Short term inhibition was triggered by 4h bafilomycin treatment while long term inhibition (4 days) by silencing ATG5 (si-ATG5). Control = DMSO-treated cells; siNT = non targeting siRNA.

**Figure S2. Autophagy inhibition increases the permeability of EC monolayer.** (A-B) Endothelial cell barrier functionality measured by FITC-albumin permeability upon ATG5 siRNA (A) or bafilomycin (bafi) treatment (B). (C) Increased FITC-albumin permeability due to autophagy blockade by bafilomycin is rescued by scavenging the ROS with NAC and vitamin C (NAC + Vit C).
